# Supplementary material
Source: PubMed Central journal article supplement (PMC10108249)
Supplement: NIHMS1868723-supplement-Supplemental_Publication_Material.pdf [file NIHMS1868723-supplement-Supplemental_Publication_Material.pdf]

## SUPPLEMENTAL MATERIAL

### Video Legends

Video S1 – How to create the “Flying V” laceration surface on a guidewire shaft.
